# Supplementary material for: County‐Level Hispanic Ethnic Density and Cardiovascular Disease Mortality
Source: PubMed Central journal article supplement — J Am Heart Assoc. 2018 Sep 19;7(19):e009107. doi: 10.1161/JAHA.118.009107 (PMC6404884; doi:10.1161/jaha.118.009107), 2018-09-19
Supplement: JAH3-7-e009107-s001.pdf [file JAH3-7-e009107-s001.pdf]

# **SUPPLEMENTAL MATERIAL**

**Table S1. Data Source and year of the variables.**

| <b>Variables</b>                               | <b>Data Source</b> | <b>Original Data Source if from County Health Rankings</b>                           | <b>Original Data year</b> |
|------------------------------------------------|--------------------|--------------------------------------------------------------------------------------|---------------------------|
| <b>Demographic Characteristics</b>             |                    |                                                                                      |                           |
| Hispanic density                               | Census/ACS         |                                                                                      | 2008                      |
| Total population size, 100k                    | Census/ACS         |                                                                                      | 2008                      |
| Hispanic population size, 100k                 | Census/ACS         |                                                                                      | 2008                      |
| NHW population size, 100k                      | Census/ACS         |                                                                                      | 2008                      |
| Hispanic deaths                                | Census/ACS         |                                                                                      | 2008                      |
| NHW deaths                                     | Census/ACS         |                                                                                      | 2008                      |
| Proportion 18 and younger                      | 2012 CHR           | Census                                                                               | 2009                      |
| Proportion 65 and older                        | 2012 CHR           | Census                                                                               | 2009                      |
| Proportion female                              | 2012 CHR           | Census                                                                               | 2009                      |
| <b>Social Economic Status</b>                  |                    |                                                                                      |                           |
| Median household income; 10k                   | Census/ACS         |                                                                                      | 2008                      |
| Proportion below poverty line                  | Census/ACS         |                                                                                      | 2008                      |
| High school graduation rate (AFGR)             | 2012 CHR           | State sources and the National Center for Education Statistics                       | varies between 2008-2010  |
| Some college graduation rate (PSED)            | 2012 CHR           | ACS 5-Year Estimates                                                                 | 2006-2010                 |
| Proportion unemployment                        | 2011 CHR           | Local Area Unemployment Statistics, Bureau of Labor Statistics                       | 2009                      |
| Proportion Black                               | 2012 CHR           | Census                                                                               | 2009                      |
| Proportion not proficient in English           | 2012 CHR           | ACS 5-Year Estimates                                                                 | 2009                      |
| Proportion rural                               | 2012 CHR           | Census                                                                               | 2009                      |
| <b>Health Care Factors</b>                     |                    |                                                                                      |                           |
| Proportion uninsured                           | 2011 CHR           | Census/American Community Survey (ACS)—Small Area Health Insurance Estimates (SAHIE) | 2007                      |
| Primary care physicians per 100,000 population | 2011 CHR           | Medicare claims/Dartmouth Atlas                                                      | 2008                      |

**Table S2. Multivariate Linear Regression Models for Hispanic and Non-Hispanic White CVD Mortality by the Hispanic Isolation Index.**

| Adjustment Variables             | Hispanic AMR |               |         |                | Non-Hispanic White AMR |               |         |                |
|----------------------------------|--------------|---------------|---------|----------------|------------------------|---------------|---------|----------------|
|                                  | N            | Change in AMR | p-value | R <sup>2</sup> | N                      | Change in AMR | p-value | R <sup>2</sup> |
| Base Model                       | 715          | 24.80         | <.0001  | 0.18           | 715                    | 2.51          | 0.2106  | 0.01           |
| Base Model + SES*                | 706          | 13.61         | <.0001  | 0.35           | 706                    | -6.68         | 0.0102  | 0.30           |
| Base Model + Health Care Factors | 715          | 19.34         | <.0001  | 0.23           | 715                    | -4.19         | 0.0730  | 0.10           |
| Fully Adjusted Model*            | 706          | 14.47         | <.0001  | 0.36           | 706                    | -6.77         | 0.0095  | 0.31           |

AMR= Age-adjusted Mortality Rates

Base Model includes Hispanic isolation index, Population Size and Proportion Female

SES: Median household income, % Under poverty line, % High school graduation, % Some college graduation, %

Unemployed, %Black, % Not proficient in English and % Rural

Health Care Factors: % Uninsured, Primary Care Physician Rate

Fully Adjusted Model: Base model + SES + Health Care Factors

\*9 counties are missing High School Graduation Rate and are therefore not included in the SES adjusted models. These counties include: Orleans, Marin, Richmond, Kings, New York, Queens, Bronx, Jeff Davis, and Yuma.
